# Supplementary material for: Innate immune control of influenza virus interspecies adaptation via IFITM3
Source: Springer Nature journal article supplement (doi:10.1038/s41467-024-53792-3), 2024-10-30
Supplement: MOESM1 [file 41467_2024_53792_MOESM1_ESM.pdf]

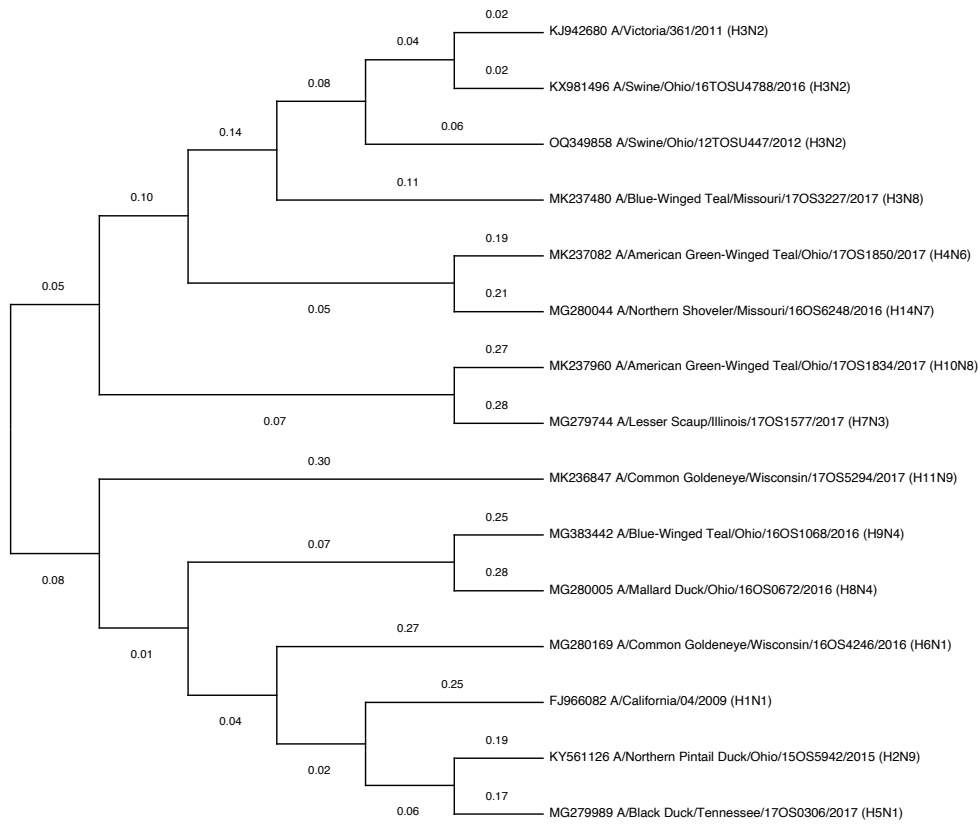

**Supplementary Figure 1. Phylogenetic tree of avian-, swine-, and human-origin influenza viruses utilized in this study.** Alignments and tree estimates for whole HA genomic segments were performed using Molecular Evolutionary Genetics Analysis (MEGA) software. Values represent the number of nucleotide substitutions normalized to the length of the sequences. The letter number combinations, such as MG279989, are the Genbank IDs for the HA gene segments of the individual viruses that were used to construct this phylogenetic table.

**a**

**A549 Cell Gating**

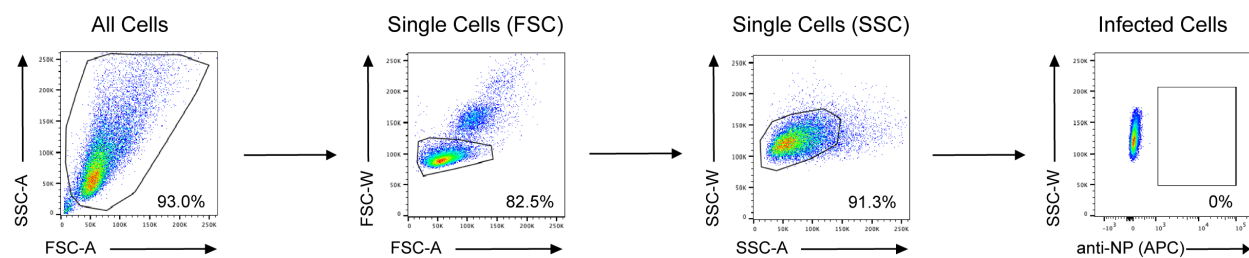

**b**

**THP-1 Cell Gating**

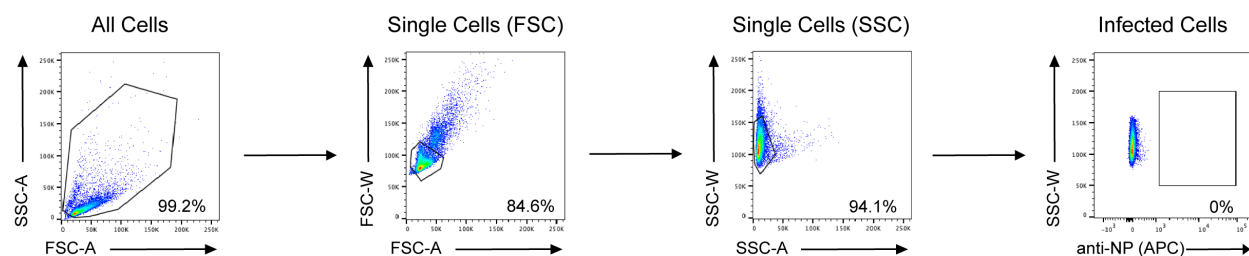

**c**

**HAP1 Cell Gating**

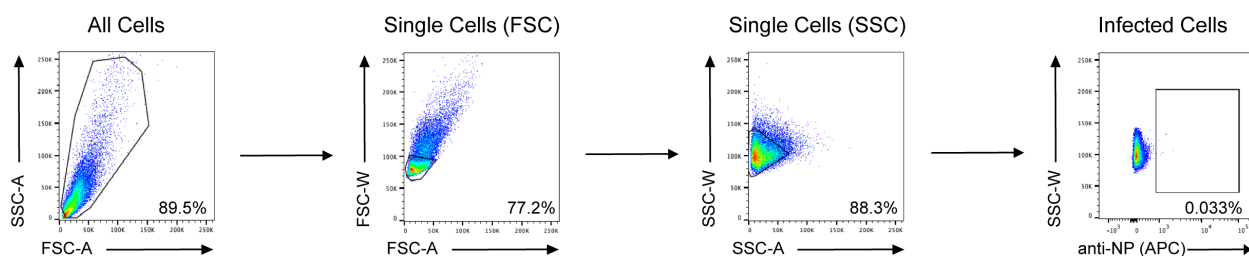

**d**

**HeLa Cell Gating**

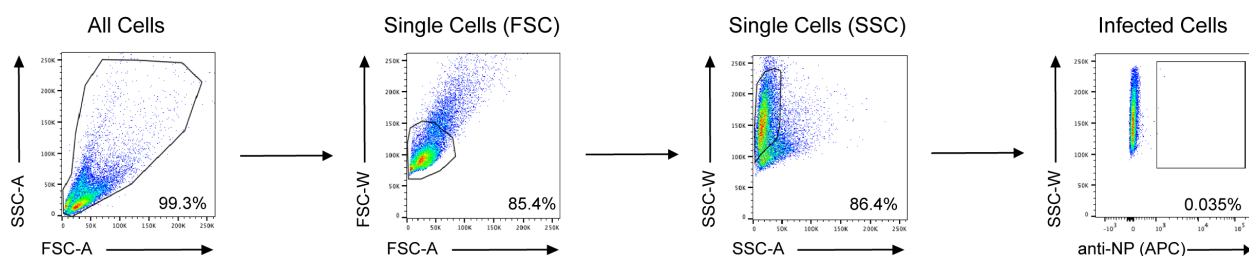

**Supplementary Figure 2. Gating strategy for determining percent infection. a-d**

Representative flow cytometry dot plots displaying the gating strategy utilized to analyze percent infection. All cell types were gated on non-infected control cells, the gates were then uniformly applied to all samples. First, all cells were gated on FSC-A versus SSC-A, the resulting population was used to then gate out single cells. Single cells were gated first on FSC-W versus FSC-A and that population was subsequently gated on SSC-W versus SSC-A. Finally the single cell population was gated for infected cells on SSC-W versus APC-A (the channel detecting the anti-influenza nucleoprotein with secondary antibody labeled with Alexafluor 647.). (a) A549 cells. (b) THP-1 cells. (c) HAP1 cells. (d) HeLa cells.

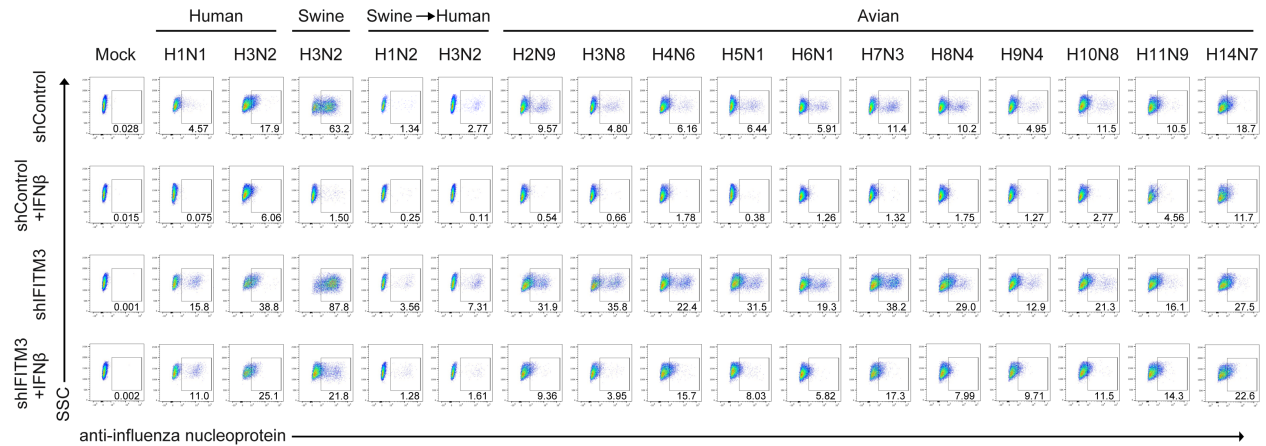

**Supplementary Figure 3. Example raw flow cytometry data for determination of normalized infection of control (shControl) and IFITM3-knockdown (shIFITM3) A549 lung cells +/- IFN $\beta$  treatment with each of the indicated virus strains as in main text Figure 1.** SSC, side scatter; Anti-influenza nucleoprotein antibody was detected in the APC channel with secondary antibody labeled with Alexafluor 647.

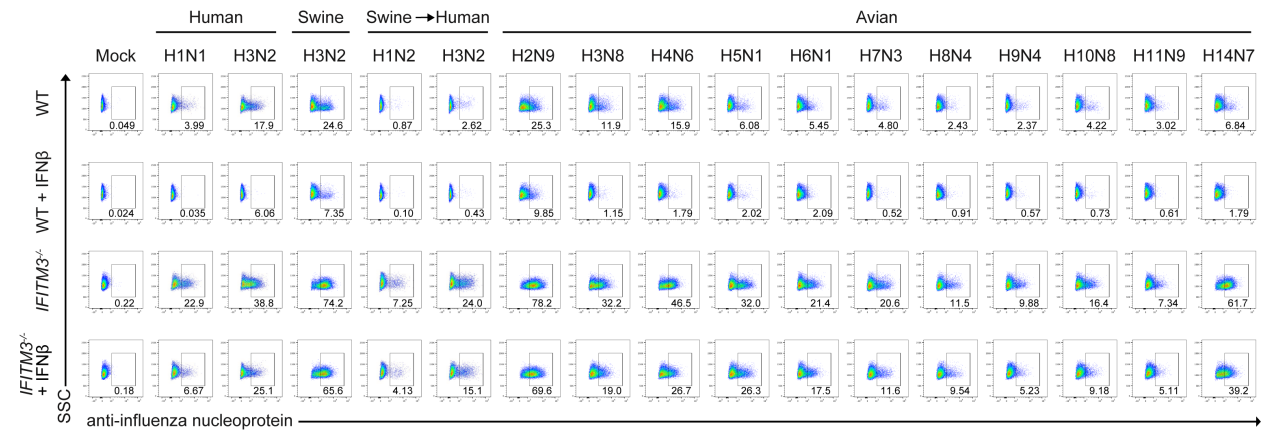

**Supplementary Figure 4. Example raw flow cytometry data for determination of normalized infection of WT and *IFITM3*<sup>-/-</sup> THP-1 macrophages +/- IFN $\beta$  treatment with each of the indicated virus strains as in main text Figure 1.** SSC, side scatter; Anti-influenza nucleoprotein antibody was detected in the APC channel with secondary antibody labeled with Alexafluor 647.

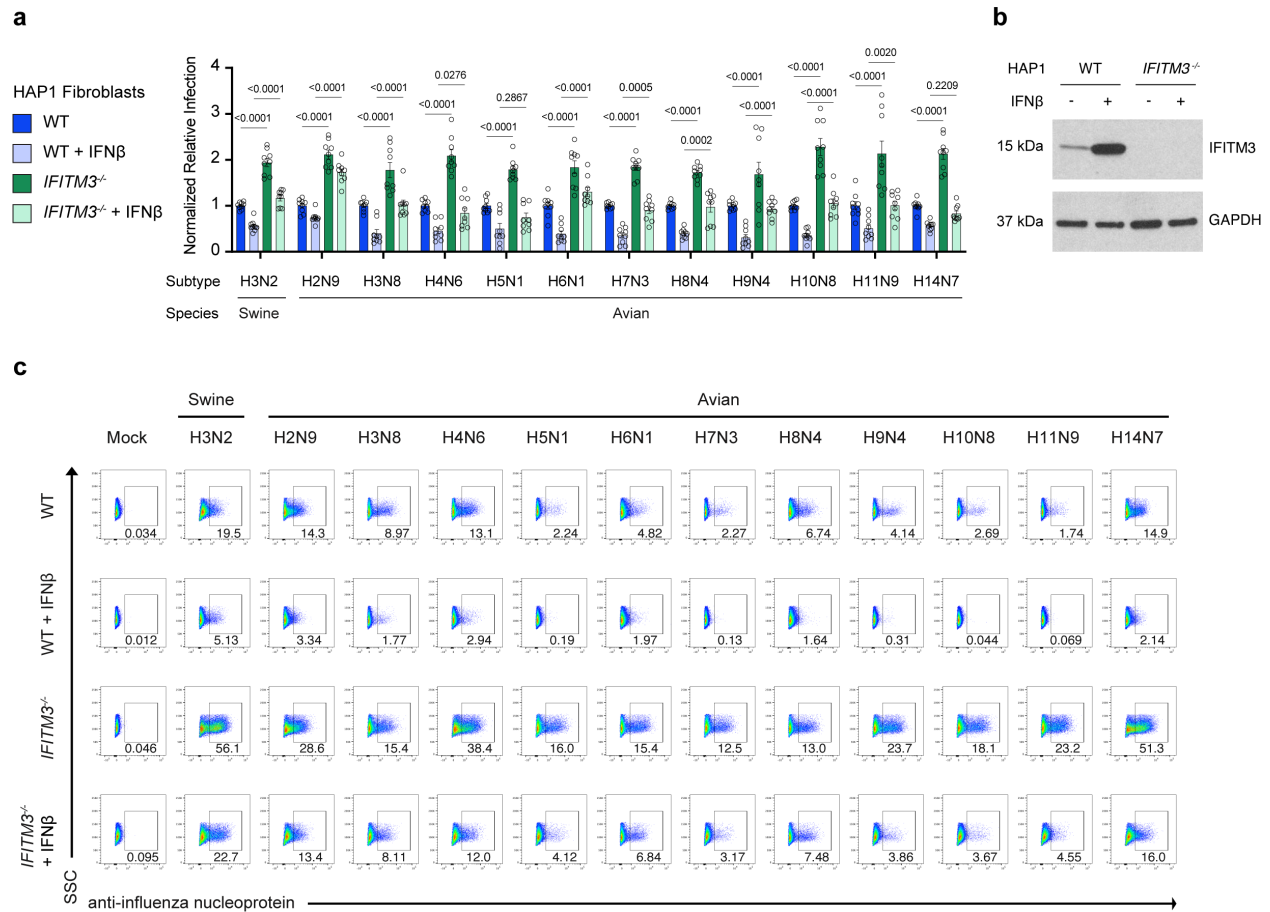

**Supplementary Figure 5. IFITM3 limits animal-origin influenza virus infection of human fibroblast cells.** HAP1 cells were treated +/- IFN $\beta$  for 18 hours, followed by infection with indicated viruses (MOI 1) for 24 hours. **(a)** Percent infection was determined by flow cytometry and normalized to results for WT cells without IFN $\beta$  pre-treatment. Error bars represent SEM. Exact p values are for the indicated comparisons and were determined by one-way ANOVA followed by Tukey's multiple comparisons test. Only statistical comparisons between WT versus IFITM3<sup>-/-</sup> are shown. Data are representative of 3 independent experiments each performed in triplicate (n=9). **(b)** Western blots of cell lysates at 18 hours +/- IFN $\beta$  treatment. **(c)** Example raw flow cytometry data for determination of normalized infection of WT and IFITM3<sup>-/-</sup> HAP1 cells +/- IFN $\beta$  treatment with each of the indicated virus strains as in **(a)**. SSC, side scatter; Anti-influenza nucleoprotein antibody was detected in the APC channel with secondary antibody labeled with Alexafluor 647. Source data **(a, b)** are provided as a Source Data file. Gating strategy in **Supplementary Figure 2. c**.

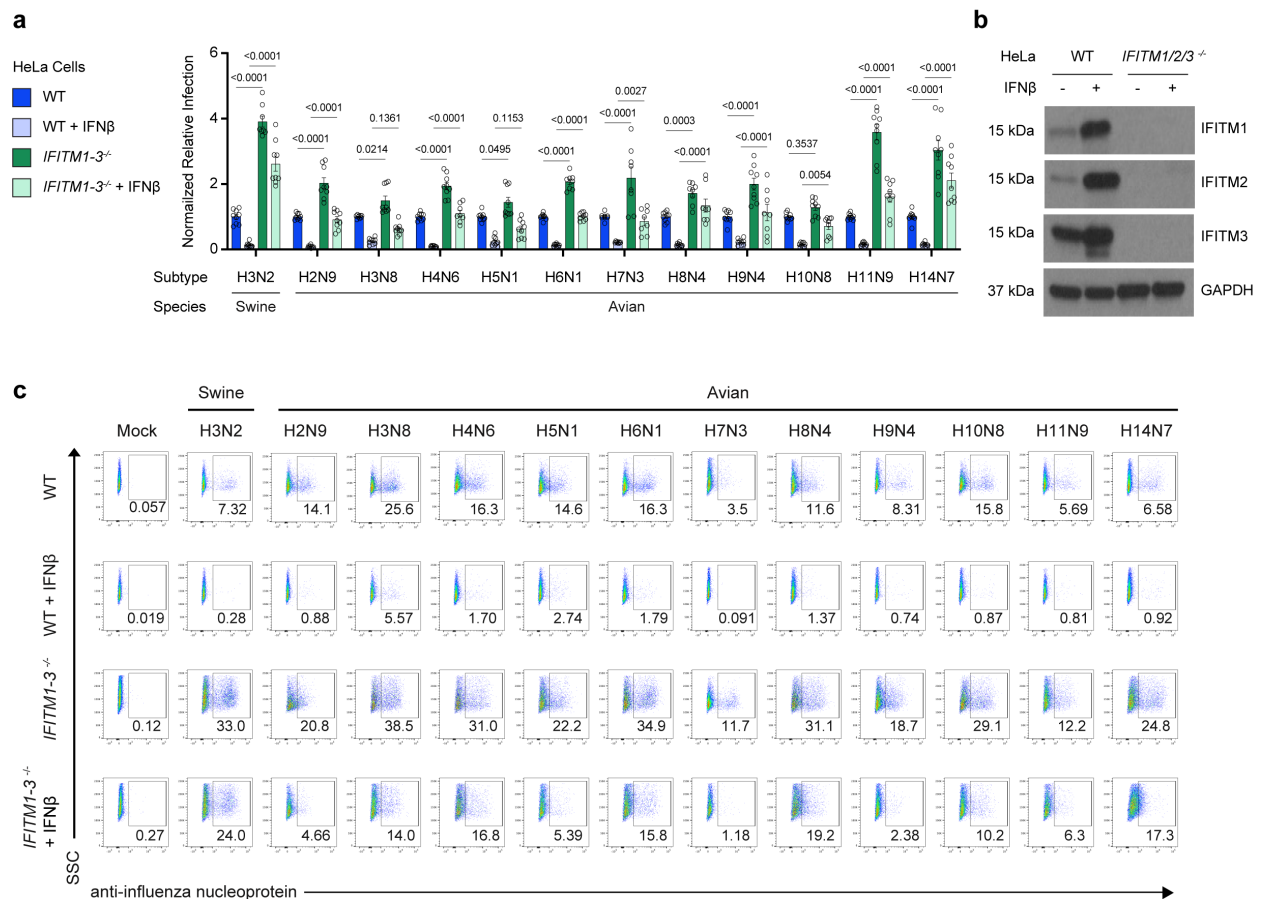

**Supplementary Figure 6. IFITM3 limits animal-origin influenza virus infection of HeLa cells.** HeLa cells were treated +/- IFN $\beta$  for 18 hours, followed by infection with indicated viruses (MOI 1) for 24 hours. **(a)** Percent infection was determined by flow cytometry and normalized to results for WT cells without IFN $\beta$  pre-treatment. Error bars represent SEM. P values shown are for the indicated comparisons and were determined by one-way ANOVA followed by Tukey's multiple comparisons test. Only statistical comparisons between WT versus IFITM3 $^{-/-}$  are shown. Data are representative of 3 independent experiments each performed in triplicate (n=9). **(b)** Western blots of cell lysates at 18 hours +/- IFN $\beta$  treatment. **(c)** Example raw flow cytometry data for determination of normalized infection of WT and IFITM1/2/3 $^{-/-}$  HeLa cells +/- IFN $\beta$  treatment with each of the indicated virus strains as in **(a)**. SSC, side scatter; Anti-influenza nucleoprotein antibody was detected in the APC channel with secondary antibody labeled with Alexafluor 647. All numbers above the graph represent exact p values. Source data **(a, b)** are provided as a Source Data file. Gating strategy in **Supplementary Figure 2. d**.

**a** H3N2 Passage Series 1 - A549

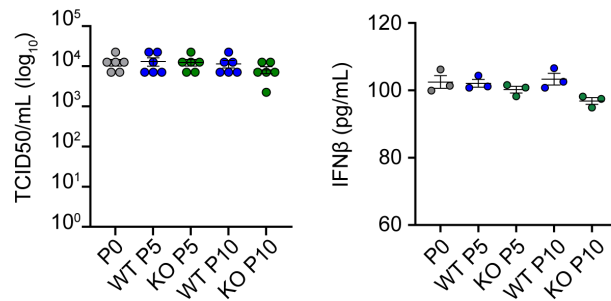

**b** H3N2 Passage Series 1 - LET1

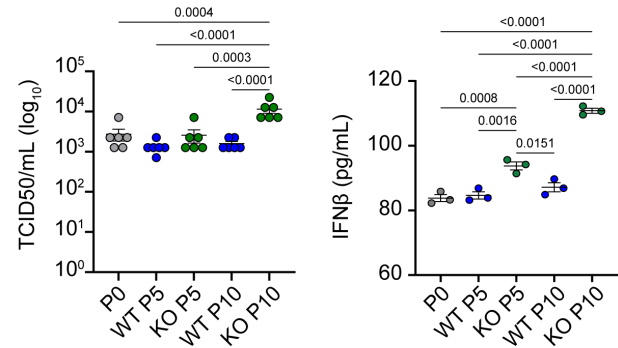

**c** H3N2 Passage Series 2 - A549

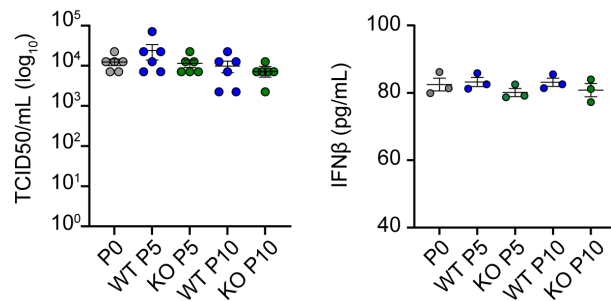

**d** H3N2 Passage Series 2 - LET1

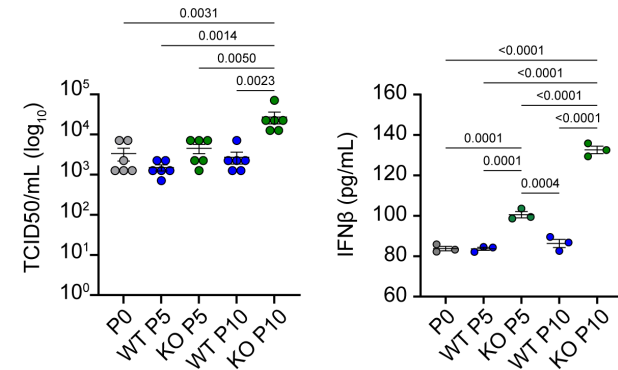

**Supplementary Figure 7 . Increased viral replication and cytokine production of IFITM3 KO passaged A/Victoria/361/2011 (H3N2) virus in LET1 cells versus A549 cells.** A549 or LET1 cells were infected with the indicated influenza viruses at an MOI of 1 and incubated in media containing TPCK-Trypsin for 48 hours to allow for multi-cycle replication. The supernatants were collected to determine viral titer and IFN $\beta$  levels were determined by ELISA. **(a,b)** H3N2 passaging series 1. **(c,d)** H3N2 passaging series 2. Titer data is representative of 2 independent experiments each performed in triplicate (n=6) and each dot in the ELISA data indicates an independent cell infection (n=3). Only comparisons between control and knockdown cells are shown for each virus. All error bars represent SEM. Comparisons were analyzed by ANOVA followed by Tukey's multiple comparisons test with numbers shown above the graph representing exact p values. Source data are provided as a Source Data file.

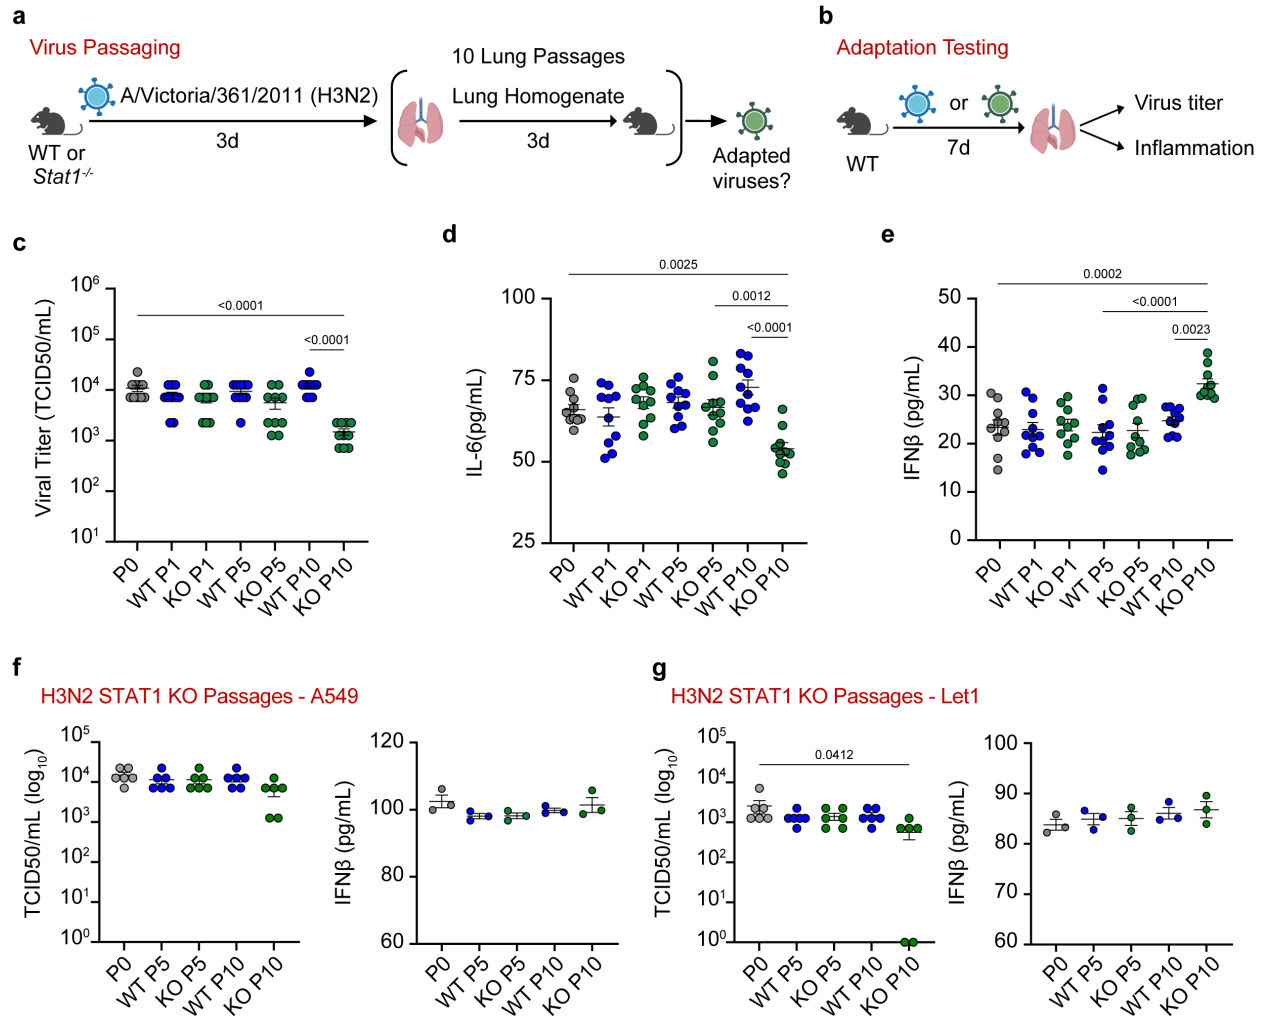



**Supplementary Figure 8. Influenza virus becomes attenuated when passaged in the absence of STAT1.** (a) Schematic of mouse passaging experiments. Initial intranasal infections were performed with 1,000 TCID<sub>50</sub> of A/Victoria/361/2011 (H3N2). (b) Schematic of WT mouse challenged with 1,000 TCID<sub>50</sub> of the parental or passaged viruses. (c,d) Groups of WT mice were challenged with equal doses of virus passaged 1, 5, or 10 times through WT or *Stat1*<sup>-/-</sup> mice and compared to the parent virus (passage 0). (c) Viral titers from lung homogenates collected at day 7 post infection. Error bars represent SEM. Comparisons were analyzed by ANOVA followed by Tukey's multiple comparisons test (d,e) ELISA quantification of IL-6 (d) levels in lung homogenates of WT and IFITM3 KO mice at day 7 post infection. All error bars represent SEM. Comparisons were analyzed by one-way ANOVA followed by Tukey's multiple comparisons test. c-e represents 2 independent experiments (n=10). (f,g) A549 or LET1 cells were infected with the indicated influenza viruses at an MOI of 1 and incubated in media containing TPCK-Trypsin for 48 hours to allow for multi-cycle replication. The supernatants were collected to determine viral titer and IFN $\beta$  levels were determined by ELISA. Titer data is representative of 2 independent experiments each performed in triplicate (n=6) and each dot in the ELISA data indicates an independent cell infection (n=3). Only comparisons between control and knockdown cells are shown for each virus. All error bars represent SEM. Comparisons were analyzed by one-way ANOVA followed by Tukey's multiple comparisons test. All numbers shown above the graphs represent exact p values. Source data (c-g) are provided as a Source Data file. (a, b) Created in BioRender. Denz, P. (2024) BioRender.com/r93l474

**a H1N1 Passage Series 1 - A549**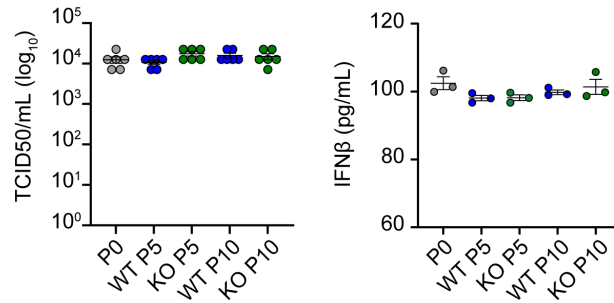**b H1N1 Passage Series 1 - LET1**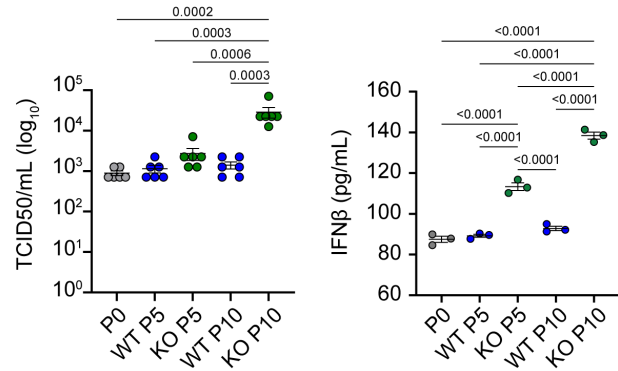**c H1N1 Passage Series 2 - A549**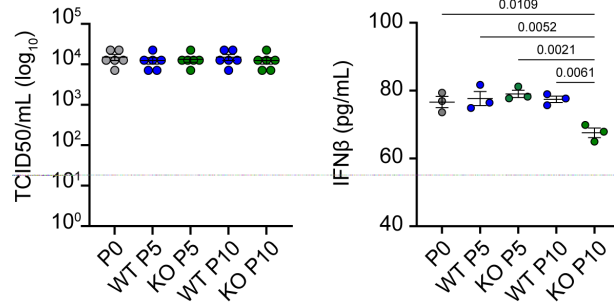**d H1N1 Passage Series 2 - LET1**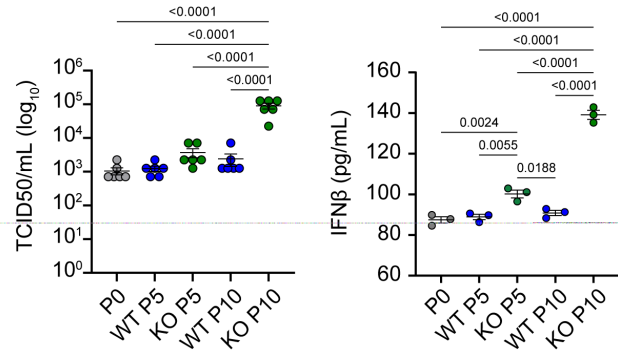

**Supplementary Fig 9. Increased viral replication and cytokine production of IFITM3 KO passaged A/California/04/2009 (H1N1) virus in LET1 cells versus A549 cells.** A549 or LET1 cells were infected with the indicated influenza viruses at an MOI of 1 and incubated in media containing TPCK-Trypsin for 48 hours to allow for multi-cycle replication. The supernatants were collected to determine viral titer and IFN $\beta$  levels were determined by ELISA. **(a,b)** H1N1 passaging series 1. **(c,d)** H1N1 passaging series 2. Titer data is representative of 2 independent experiments each performed in triplicate (n=6) and each dot in the ELISA data indicates an independent cell infection (n=3). Only comparisons between control and knockdown cells are shown for each virus. All error bars represent SEM. Comparisons were analyzed by one-way ANOVA followed by Tukey's multiple comparisons test. All numbers shown above the graphs represent exact p values. Source data are provided as a Source Data file.

| Influenza Virus Strain                                  | Treated TRBC ( $\alpha$ -2,6) Titer | TRBC ( $\alpha$ -2,6/ $\alpha$ -2,3) Titer | HRBC ( $\alpha$ -2,3) Titer | Receptor Preference |
|---------------------------------------------------------|-------------------------------------|--------------------------------------------|-----------------------------|---------------------|
| A/California/04/2009 (H1N1), Human                      | 512                                 | 512                                        | <2                          | $\alpha$ -2,6       |
| A/Victoria/361/2011 (H3N2), Human                       | 2048                                | 4069                                       | <2                          | $\alpha$ -2,6       |
| A/Swine/Ohio/18TOSU4536/2018 (H1N2)                     | 256                                 | 512                                        | 8                           | $\alpha$ -2,6       |
| A/Swine/Ohio/16TOSU4788/2016 (H3N2)                     | 128                                 | 128                                        | <2                          | $\alpha$ -2,6       |
| A/Swine/Ohio/12TOSU0447/2012 (H3N2)                     | 4069                                | 1024                                       | 8                           | $\alpha$ -2,6       |
| A/Northern Pintail Duck/Ohio/15OS5942/2015 (H2N9)       | <2                                  | 64                                         | 32                          | $\alpha$ -2,3       |
| A/Blue-Winged Teal/Missouri/17OS3227/2017 (H3N8)        | <2                                  | 512                                        | 32                          | $\alpha$ -2,3       |
| A/American Green-Winged Teal/Ohio/17OS1850/2017 (H4N6)  | <2                                  | 1024                                       | 1024                        | $\alpha$ -2,3       |
| A/Black Duck/Tennessee/17OS0306/2017 (H5N1)             | <2                                  | 32                                         | 32                          | $\alpha$ -2,3       |
| A/Common Goldeneye/Wisconsin/16OS4246/2016 (H6N1)       | 32                                  | 32                                         | 32                          | Both                |
| A/Lesser Scaup/Illinois/17OS1577/2017 (H7N3)            | 4                                   | 128                                        | 128                         | $\alpha$ -2,3       |
| A/Mallard Duck/Ohio/16OS0672/2016 (H8N4)                | <2                                  | <2                                         | <2                          | ND                  |
| A/Blue-Winged Teal/Ohio/16OS1068/2016 (H9N4)            | 64                                  | 64                                         | 32                          | Both                |
| A/American Green-Winged Teal/Ohio/17OS1834/2017 (H10N8) | 8                                   | 8                                          | 8                           | Both                |
| A/Common Goldeneye/Wisconsin/17OS5294/2017 (H11N9)      | 2048                                | 2048                                       | 2048                        | Both                |
| A/Northern Shoveler/Missouri/16OS6248/2016 (H14N7)      | <2                                  | 32                                         | 32                          | $\alpha$ -2,3       |

**Supplementary Table 1. Virus strains utilized in this study and their sialic acid receptor binding preferences.** Data shown are hemagglutination titers used to determine virus sialic acid receptor binding preferences. TRBC, turkey red blood cell; Treated TRBC indicates TRBC incubated with a neuraminidase enzyme to remove  $\alpha$ -2,3 sialic acid linkages; HRBC, horse red blood cell; ND, not determinable.

Uncropped scans of Western Blots:

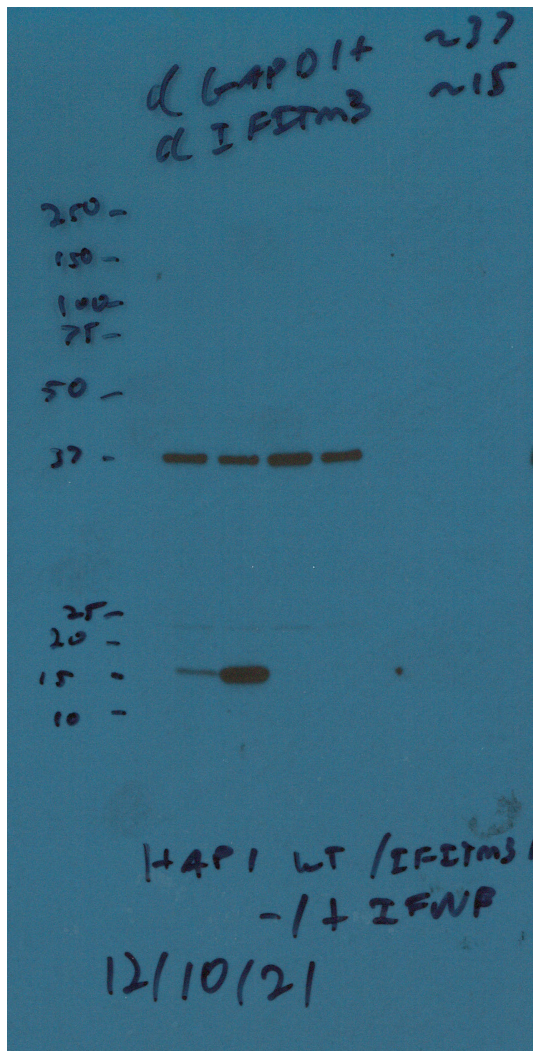

**Supplementary Figure 4b. HAP1 cell westerns.** anti-GAPDH and anti-IFITM3 antibodies used to probe whole cell protein lysates (30 second exposure). Protein ladder 10-250 kDa, lanes (left to right) HAP1 WT, HAP1 WT + IFN $\beta$ , HAP1 *IFITM3*<sup>-/-</sup>, HAP1 *IFITM3*<sup>-/-</sup> + IFN $\beta$ .

a.

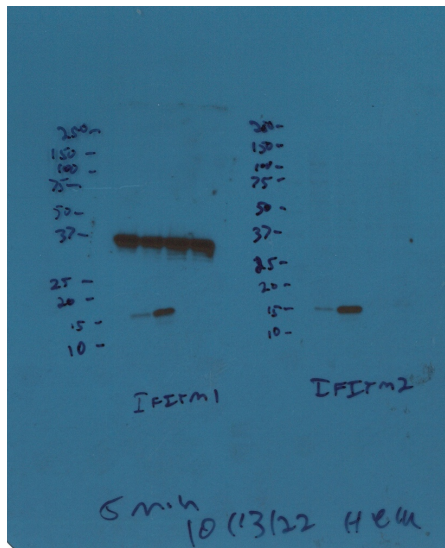

b.

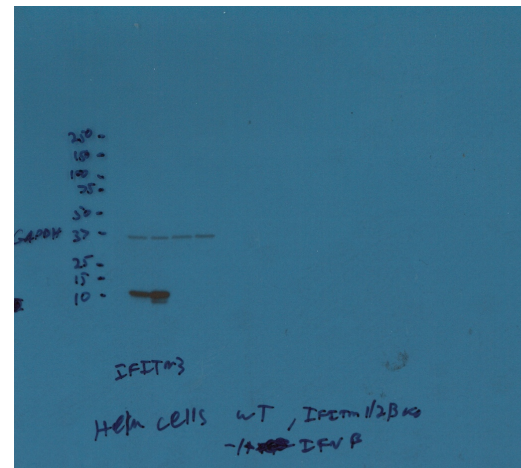

c.

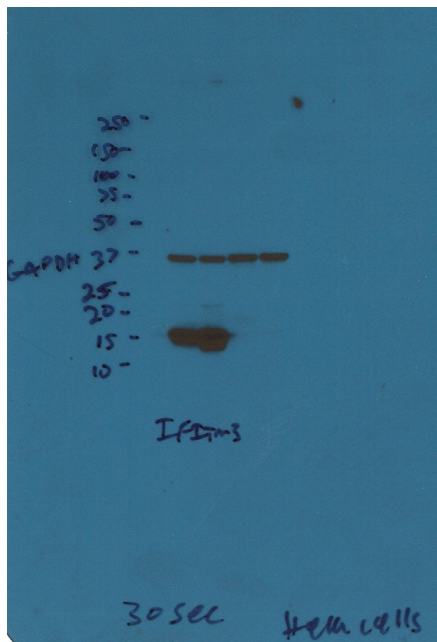

**Supplementary Figure 5b HeLa cell westerns.** anti-IFITM1, anti-IFITM2, anti-IFITM3, and anti-GAPDH antibodies used to probe whole cell protein lysates (30 second exposure and 5 minute exposure). Protein ladder 10-250 kDa, lanes (left to right) HeLa WT, HeLa WT + IFN $\beta$ , HeLa *IFITM1-3<sup>-/-</sup>*, HeLa *IFITM1-3<sup>-/-</sup>* + IFN $\beta$ . **a.** anti-GAPDH, anti-IFITM1, anti-IFITM2 (5 minute exposure). **b.** anti-GAPDH and anti-IFITM3 (instant exposure). **c.** anti-GAPDH and anti-IFITM3 (30 second exposure).
